# Supplementary material
Source: Springer Nature journal article supplement (https://www.springermedizin.de/resource/supplementary/12937_2014_854_MOESM3_ESM.pdf/25653974)
Supplement: MOESM3 [file 25653974]

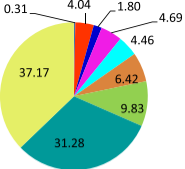

**Mexican American**

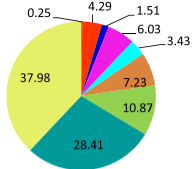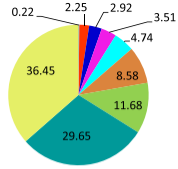

**Non-Hispanic White**

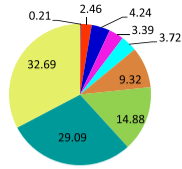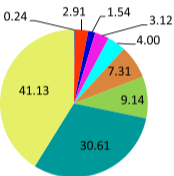

**Other Hispanic**

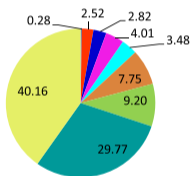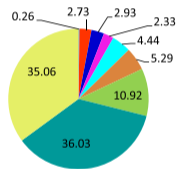

**Non-Hispanic Black**

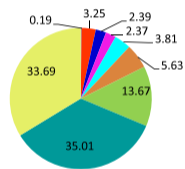

- Fruits
- Fats, Oils, and Salad Dressings
- Dry Beans, Peas, Other Legumes, Nuts & Seeds
- Sugars, Sweets & Beverages
- Milk and Milk Products
- Vegetables
- Grain Products

- Eggs
- Meat, Poultry, Fish & Mixtures
